# Supplementary material
Source: PubMed Central journal article supplement (PMC9525388)
Supplement: 12325_2022_2306_MOESM1_ESM.pdf [file 12325_2022_2306_MOESM1_ESM.pdf]

## Supplementary Material

### Length of Stay and Costs with Autologous Skin Cell Suspension versus Split-thickness Skin Grafts: Burn Care Data from U.S. Centers

Jeffrey E. Carter, MD<sup>1</sup>, Joshua S. Carson, MD<sup>2</sup>, William L. Hickerson, MD, FACS<sup>3</sup>, Lisa Rae, MD<sup>4</sup>,  
Syed F. Saquib, MD<sup>5</sup>, Lucy A. Wibbenmeyer, MD<sup>6</sup>, Russell V. Becker, MA<sup>7</sup>,  
Thomas P. Walsh, MBA<sup>8</sup>, Jeremiah A. Sparks, MBA<sup>8</sup>

<sup>1</sup> University Medical Center Burn Center, New Orleans, LA, USA

<sup>2</sup> The Loyola Burn Center, Maywood, IL, USA

<sup>3</sup> Memphis, TN, USA

<sup>4</sup> Temple Burn Center, Philadelphia, PA, USA

<sup>5</sup> UMC Lions Burn Care Center & Kirk Kerkorian School of Medicine at UNLV, Las Vegas, NV, USA

<sup>6</sup> University of Iowa, IA, USA

<sup>7</sup> Russell Becker Consulting, Chicago, IL, USA

<sup>8</sup> AVITA Medical, Valencia, CA, USA

#### Corresponding Author:

Thomas P. Walsh  
28159 Avenue Stanford  
Suite 220  
Valencia, CA 91355  
USA  
Email: [twalsh@avitamedical.com](mailto:twalsh@avitamedical.com)

**Table S1: ICD-10-PCS codes used to identify patients undergoing skin graft procedures**

| OHR_X72                                                                                                   |                         |                                                                                                                                                   |                                |                             |
|-----------------------------------------------------------------------------------------------------------|-------------------------|---------------------------------------------------------------------------------------------------------------------------------------------------|--------------------------------|-----------------------------|
| Description: Skin replacement on the _____, autologous tissue substitute, using Cell Suspension Technique |                         |                                                                                                                                                   |                                |                             |
| Section                                                                                                   | 0                       | Medical and Surgical                                                                                                                              |                                |                             |
| Body System                                                                                               | H                       | Skin and Breast                                                                                                                                   |                                |                             |
| Operation                                                                                                 | R                       | Replacement: putting in or on biological or synthetic material that physically takes the place and/or function of all or a portion of a body part |                                |                             |
| Body Part                                                                                                 |                         | Approach                                                                                                                                          | Device                         | Qualifier                   |
| 0 Skin, Scalp                                                                                             | A Skin, Inguinal        | X External                                                                                                                                        | 7 Autologous Tissue Substitute | 2 Cell Suspension Technique |
| 1 Skin, Face                                                                                              | B Skin, Right Upper Arm |                                                                                                                                                   |                                | 3 Full Thickness            |
| 2 Skin, Right Ear                                                                                         | C Skin, Left Upper Arm  |                                                                                                                                                   |                                | 4 Partial Thickness         |
| 3 Skin, Left Ear                                                                                          | D Skin, Right Lower Arm |                                                                                                                                                   |                                |                             |
| 4 Skin, Neck                                                                                              | E Skin, Left Lower Arm  |                                                                                                                                                   |                                |                             |
| 5 Skin, Chest                                                                                             | F Skin, Right Hand      |                                                                                                                                                   |                                |                             |
| 6 Skin, Back                                                                                              | G Skin, Left Hand       |                                                                                                                                                   |                                |                             |
| 7 Skin, Abdomen                                                                                           | H Skin, Right Upper Leg |                                                                                                                                                   |                                |                             |
| 8 Skin, Buttock                                                                                           | J Skin, Left Upper Leg  |                                                                                                                                                   |                                |                             |
| 9 Skin, Perineum                                                                                          | K Skin, Right Lower Leg |                                                                                                                                                   |                                |                             |
|                                                                                                           | L Skin, Left Lower Leg  |                                                                                                                                                   |                                |                             |
|                                                                                                           | M Skin, Right Foot      |                                                                                                                                                   |                                |                             |
|                                                                                                           | N Skin, Left Foot       |                                                                                                                                                   |                                |                             |

Source: Centers for Medicare and Medicaid Services. 2022 ICD-10-PCS Code Tables and Index.

<https://www.cms.gov/files/zip/2022-code-tables-tabular-and-index.zip>. Accessed November 17, 2021.

**Table S2: ICD-10-CM codes used for selection of ASCS-eligible patients**

| % of Body Surface | % of Third-degree Burn | ICD-10-CM Code |
|-------------------|------------------------|----------------|
| <10%              | 0%-9%                  | T31.0          |
| 10%-19%           | 0%-9%                  | T31.10         |
|                   | 10%-19%                | T31.11         |
| 20%-29%           | 0%-9%                  | T31.20         |
|                   | 10%-19%                | T31.21         |
|                   | 20%-29%                | T31.22         |
| 30%-39%           | 0%-9%                  | T31.30         |
|                   | 10%-19%                | T31.31         |
|                   | 20%-29%                | T31.32         |
|                   | 30%-39%                | T31.33         |
| 40%-50%           | 0%-9%                  | T31.40         |
|                   | 10%-19%                | T31.41         |
|                   | 20%-29%                | T31.42         |
|                   | 30%-39%                | T31.43         |
|                   | 40%-49%                | T31.44         |

Source: Centers for Disease Control and Prevention, National Center for Health Statistics. International Classification of Diseases, Tenth Revision, Clinical Modification (ICD-10-CM).
